# Supplementary material for: Sex-dependent effect of GPR109A gene deletion in myeloid cells on bone development in mice
Source: Research Square preprint supplement (doi:10.21203/rs.3.rs-6206075/v1), 2025-04-02
Supplement: Supplementary file 2 [file 6fb43e106e956c8cde3231bf.xlsx]

## Sheet: 35 days
Animal	Age	GT	Sex	Weight						Animal	Age	GT	Sex	Weight
9535m	35 days	f/f	F	16						8089x	35 days	f/f	M	20.4
8229m	35 days	f/f	F	13.1						8092x	35 days	f/f	M	19
8230m	35 days	f/f	F	14.9						8475h	35 days	f/f	M	19.2
8476h	35 days	f/f	F	14.6						8596x	35 days	f/f	M	17.2
8477h	35 days	f/f	F	16.2						8597x	35 days	f/f	M	19.5
8478h	35 days	f/f	F	14						8686h	35 days	f/f	M	18.3
8479h	35 days	f/f	F	15.4						8687h	35 days	f/f	M	20.2
8480h	35 days	f/f	F	15.9						8688h	35 days	f/f	M	19.5
8598x	35 days	f/f	F	16.3						8396m	35 days	f/f	M	17.7
8599x	35 days	f/f	F	17.3						8397m	35 days	f/f	M	18.7
8227	35 days	f/+/cre+/+	F	14.7						8223	35 days	f/+/cre+/+	M	18.4
8613	35 days	f/+/cre+/+	F	13.3						8224	35 days	f/+/cre+/+	M	18.3
8614	35 days	f/+/cre+/+	F	12.8						8573	35 days	f/+/cre+/+	M	17.6
8934	35 days	f/+/cre+/+	F	15.6						8935	35 days	f/+/cre+/+	M	19.3
8937	35 days	f/+/cre+/+	F	15.9						8936	35 days	f/+/cre+/+	M	17.6
9026	35 days	f/+/cre+/+	F	14.2						9023	35 days	f/+/cre+/+	M	13
9081	35 days	f/+/cre+/+	F	14						9076	35 days	f/+/cre+/+	M	19
9204	35 days	f/+/cre+/+	F	14.1						9250	35 days	f/+/cre+/+	M	16.1
9254	35 days	f/+/cre+/+	F	16						9251	35 days	f/+/cre+/+	M	17
9255	35 days	f/+/cre+/+	F	14.7						9296	35 days	f/+/cre+/+	M	15.8
135	35 days	f/+/cre+/+	F	14.7						8226	35 days	f/f/cre+/+	M	16.7
8444	35 days	f/f/cre+/+	F	15.4						8440	35 days	f/f/cre+/+	M	18.7
8449	35 days	f/f/cre+/+	F	13.2						8441	35 days	f/f/cre+/+	M	18
8615	35 days	f/f/cre+/+	F	13.1						8442	35 days	f/f/cre+/+	M	17.5
8634	35 days	f/f/cre+/+	F	12.8						8609	35 days	f/f/cre+/+	M	14
8635	35 days	f/f/cre+/+	F	14						8630	35 days	f/f/cre+/+	M	16.5
8636	35 days	f/f/cre+/+	F	15.1						8631	35 days	f/f/cre+/+	M	19.9
8637	35 days	f/f/cre+/+	F	15.2						8632	35 days	f/f/cre+/+	M	16.8
8638	35 days	f/f/cre+/+	F	16.6						8633	35 days	f/f/cre+/+	M	18.5
8612	35 days	f/f/cre+/+	F	16.3						8862	35 days	f/f/cre+/+	M	18.1
8863	35 days	f/f/cre+/+	F	15						8007	35 days	cre+/+	M	15.3
8013	35 days	cre+/+	F	15						8008	35 days	cre+/+	M	19.4
8014	35 days	cre+/+	F	13.8						8009	35 days	cre+/+	M	16.6
8539	35 days	cre+/+	F	17.2						8010	35 days	cre+/+	M	17.8
8540	35 days	cre+/+	F	17.8						8011	35 days	cre+/+	M	16.4
8542	35 days	cre+/+	F	19.8						8012	35 days	cre+/+	M	19
8925	35 days	cre+/+	F	16.8						8043	35 days	cre+/+	M	18.4
9929	35 days	cre+/+	F	16.1						8538	35 days	cre+/+	M	20.7
9930	35 days	cre+/+	F	14.2						8923	35 days	cre+/+	M	14.9
9996	35 days	cre+/+	F	14.1						8924	35 days	cre+/+	M	17.3
66	35 days	cre+/+	F	13.9						8404x	35 days	WT	M	17.6
8586x	35 days	WT	F	16.7						8576m	35 days	WT	M	21.1
8587x	35 days	WT	F	17.7						8585x	35 days	WT	M	22.1
8588x	35 days	WT	F	15.5						8603x	35 days	WT	M	10.7
8589x	35 days	WT	F	17.8						8689x	35 days	WT	M	15.3
8989x	35 days	WT	F	12.8						8690x	35 days	WT	M	16.2
8990x	35 days	WT	F	13.8						8691x	35 days	WT	M	17
8991x	35 days	WT	F	14.2						8692x	35 days	WT	M	15.3
8992x	35 days	WT	F	14.3						9339x	35 days	WT	M	19.8
8993x	35 days	WT	F	15						9438x	35 days	WT	M	22.5
8994x	35 days	WT	F	13.8						8577m	35 days	f/+	M	16.2
8398m	35 days	f/+	F	14.9						8580x	35 days	f/+	M	18.7
8945x	35 days	f/+	F	19.4						8581x	35 days	f/+	M	19.5
9539x	35 days	f/+	F	12.3						8604x	35 days	f/+	M	16.4
9609x	35 days	f/+	F	14.5						8605x	35 days	f/+	M	17.8
9738m	35 days	f/+	F	11.6						8943x	35 days	f/+	M	20.7
9909m	35 days	f/+	F	15.8						9593m	35 days	f/+	M	18.1
9910m	35 days	f/+	F	17.6						9595m	35 days	f/+	M	17.2
9828x	35 days	f/+	F	15.7						9605m	35 days	f/+	M	13.5
16m	35 days	f/+	F	16.6						9906m	35 days	f/+	M	18.6
17m	35 days	f/+	F	15.3

## Sheet: 3 months
Animal	Age	GT	Sex	Weight					Animal	Age	GT	Sex	Weight
8292h	3 months	f/f	F	19.5					8206m	3 months	f/f	M	27.5
8293h	3 months	f/f	F	22.1					8218h	3 months	f/f	M	26.2
8375x	3 months	f/f	F	19.4					8219h	3 months	f/f	M	23.3
8376x	3 months	f/f	F	19.3					8220h	3 months	f/f	M	24.2
8377x	3 months	f/f	F	20.9					8373x	3 months	f/f	M	22.6
8543x	3 months	f/f	F	20.6					8371x	3 months	f/f	M	24.1
8600x	3 months	f/f	F	23.3					8372x	3 months	f/f	M	23.8
8619m	3 months	f/f	F	21.8					9293m	3 months	f/f	M	26.5
8359m	3 months	f/f	F	20					7950	3 months	f/+/cre+/+	M	26.8
9780h	3 months	f/f	F	20.3					7953	3 months	f/+/cre+/+	M	26.9
9781h	3 months	f/f	F	20.6					8201	3 months	f/+/cre+/+	M	25.3
8204	3 months	f/+/cre+/+	F	18.9					8211	3 months	f/+/cre+/+	M	27.4
8210	3 months	f/+/cre+/+	F	21.7					8212	3 months	f/+/cre+/+	M	29.4
8215	3 months	f/+/cre+/+	F	22.4					8213	3 months	f/+/cre+/+	M	28.4
8620	3 months	f/+/cre+/+	F	19.8					8199	3 months	f/+/cre+/+	M	23.8
9245	3 months	f/+/cre+/+	F	21.4					8847	3 months	f/+/cre+/+	M	26.1
9246	3 months	f/+/cre+/+	F	21.7					9244	3 months	f/+/cre+/+	M	27.5
9247	3 months	f/+/cre+/+	F	18.8					9252	3 months	f/+/cre+/+	M	28
9248	3 months	f/+/cre+/+	F	19.6					8198	3 months	f/f/cre+/+	M	23
9249	3 months	f/+/cre+/+	F	23					8446	3 months	f/f/cre+/+	M	30.6
9381	3 months	f/+/cre+/+	F	19.9					8447	3 months	f/f/cre+/+	M	26.9
9382	3 months	f/+/cre+/+	F	22.2					8448	3 months	f/f/cre+/+	M	27.7
8661	3 months	f/f/cre+/+	F	23					8659	3 months	f/f/cre+/+	M	28.6
8662	3 months	f/f/cre+/+	F	18.5					8660	3 months	f/f/cre+/+	M	27.2
8663	3 months	f/f/cre+/+	F	19.3					8926	3 months	f/f/cre+/+	M	27.4
8664	3 months	f/f/cre+/+	F	20					8927	3 months	f/f/cre+/+	M	27.9
8665	3 months	f/f/cre+/+	F	21.2					8928	3 months	f/f/cre+/+	M	27.8
8864	3 months	f/f/cre+/+	F	18.1					8283	3 months	cre+/+	M	29.4
8865	3 months	f/f/cre+/+	F	18.4					8214	3 months	cre+/+	M	27.6
8866	3 months	f/f/cre+/+	F	17.5					8322	3 months	cre+/+	M	30.1
8867	3 months	f/f/cre+/+	F	16.9					8323	3 months	cre+/+	M	23.3
8868	3 months	f/f/cre+/+	F	17.2					8324	3 months	cre+/+	M	27.5
8327	3 months	cre+/+	F	20.2					8325	3 months	cre+/+	M	28.4
8328	3 months	cre+/+	F	22					8326	3 months	cre+/+	M	28.3
8329	3 months	cre+/+	F	15.4					8749	3 months	cre+/+	M	28
8982	3 months	cre+/+	F	20.4					9435	3 months	cre+/+	M	26.2
8984	3 months	cre+/+	F	19.1					223	3 months	cre+/+		26.1
69	3 months	cre+/+	F	17.2					8754x	3 months	WT	M	27
90	3 months	cre+/+	F	19					8921x	3 months	WT	M	29
224	3 months	cre+/+	F	19.3					8284m	3 months	WT	M	27.7
364	3 months	cre+/+	F	20.1					8985x	3 months	WT	M	29
365	3 months	cre+/+	F	18					8986x	3 months	WT	M	29.9
8757x	3 months	WT	F	19					8987x	3 months	WT	M	23.9
8756x	3 months	WT	F	21					8988x	3 months	WT	M	28.2
8922x	3 months	WT	F	20					9031x	3 months	WT	M	28.5
9032x	3 months	WT	F	19					9062x	3 months	WT	M	27.5
9258x	3 months	WT	F	21.5					9228x	3 months	WT	M	33.5
9259x	3 months	WT	F	20					8202m	3 months	f/+	M	23.2
9340x	3 months	WT	F	22.3					8207m	3 months	f/+	M	33.7
9341x	3 months	WT	F	20.1					15m	3 months	f/+	M	27.2
9342x	3 months	WT	F	20					55m	3 months	f/+	M	25.4
9441x	3 months	WT	F	23.3					58m	3 months	f/+	M	25.9
8860x	3 months	f/+	F	20.7					448m	3 months	f/+	M	23.1
8861x	3 months	f/+	F	24.1					449m	3 months	f/+	M	24.9
9205x	3 months	f/+	F	21.6					540m	3 months	f/+	M	29.4
9209x	3 months	f/+	F	20.1					795m	3 months	f/+	M	29.1
412m	3 months	f/+	F	21.4					799m	3 months	f/+	M	28.6
504m	3 months	f/+	F	19
812x	3 months	f/+	F	16.2
902m	3 months	f/+	F	21
903m	3 months	f/+	F	20.3										27.05	3.25687
904m	3 months	f/+	F	19.6

## Sheet: 6 months
Animal	Age	GT	Sex	Wt		Animal	Age	GT	Sex	Wt
7754x	6 months	f/f	F	27.6		7547x	6 months	f/f	M	31.5
7497h	6 months	f/f	F	22		8114x	6 months	f/f	M	30.1
7664h	6 months	f/f	F	24.7		7495h	6 months	f/f	M	27.9
7665h	6 months	f/f	F	21.9		8374x	6 months	f/f	M	28
7667h	6 months	f/f	F	23		8666x	6 months	f/f	M	34.9
7668h	6 months	f/f	F	23.1		9294m	6 months	f/f	M	31.8
7669h	6 months	f/f	F	21.5		9731m	6 months	f/f	M	29.4
7670h	6 months	f/f	F	22.2		9732m	6 months	f/f	M	28.9
7496h	6 months	f/f	F	20.8		541m	6 months	f/f	M	31.2
9807h	6 months	f/f	F	21.7		827m	6 months	f/f	M	27
802m	6 months	f/f	F	28.7		1525x	6 months	f/f	M	31.6
849x	6 months	f/f	F	20.3		1527x	6 months	f/f	M	30.9
986m	6 months	f/f	F	21.3		1643m	6 months	f/f	M	34.8
987m	6 months	f/f	F	24.8		1649x	6 months	f/f	M	27.9
1380m	6 months	f/f	F	24.2		8849	6 months	f/f/cre+/+	M	29
1409m	6 months	f/f	F	26.1		9077	6 months	f/f/cre+/+	M	28.3
1411m	6 months	f/f	F	22.6		9078	6 months	f/f/cre+/+	M	29.4
1412m	6 months	f/f	F	33.3		9079	6 months	f/f/cre+/+	M	27.8
1646m	6 months	f/f	F	24		9162	6 months	f/f/cre+/+	M	32.2
1686m	6 months	f/f	F	25.6		9163	6 months	f/f/cre+/+	M	30.8
8850	6 months	f/f/cre+/+	F	25		9198	6 months	f/f/cre+/+	M	29.4
8869	6 months	f/f/cre+/+	F	22.1		9299	6 months	f/f/cre+/+	M	25.7
8870	6 months	f/f/cre+/+	F	21.6		9300	6 months	f/f/cre+/+	M	25.7
8929	6 months	f/f/cre+/+	F	21.5		9301	6 months	f/f/cre+/+	M	30.4
8930	6 months	f/f/cre+/+	F	22.5		1347	6 months	f/f/cre+/+	M	34.5
8938	6 months	f/f/cre+/+	F	24.7		1348	6 months	f/f/cre+/+	M	34.2
8939	6 months	f/f/cre+/+	F	23.5		1349	6 months	f/f/cre+/+	M	36
9059	6 months	f/f/cre+/+	F	25.3		1350	6 months	f/f/cre+/+	M	38.8
9060	6 months	f/f/cre+/+	F	26.8		1351	6 months	f/f/cre+/+	M	30.7
9164	6 months	f/f/cre+/+	F	22.7		1454	6 months	f/f/cre+/+	M	34.4
9304	6 months	f/f/cre+/+	F	22.3		1455	6 months	f/f/cre+/+	M	30.1
1353	6 months	f/f/cre+/+	F	24.6		1638	6 months	f/f/cre+/+	M	33.6
1354	6 months	f/f/cre+/+	F	24.2		1639	6 months	f/f/cre+/+	M	36.7
1355	6 months	f/f/cre+/+	F	24.3		1683	6 months	f/f/cre+/+	M	27.1
1456	6 months	f/f/cre+/+	F	26.1		7786	6 months	cre+/+	M	31.7
1528	6 months	f/f/cre+/+	F	32.4		8750	6 months	cre+/+	M	28.4
1531	6 months	f/f/cre+/+	F	24		9713	6 months	cre+/+	M	27.4
1532	6 months	f/f/cre+/+	F	26.3		9927	6 months	cre+/+	M	32.5
1640	6 months	f/f/cre+/+	F	29.6		9928	6 months	cre+/+	M	31.2
1641	6 months	f/f/cre+/+	F	20.9		9991	6 months	cre+/+	M	29.1
1642	6 months	f/f/cre+/+	F	31.4		9992	6 months	cre+/+	M	32.3
366	6 months	cre+/+	F	23.8		62	6 months	cre+/+	M	30.3
367	6 months	cre+/+	F	20.6		64	6 months	cre+/+	M	27.7
419	6 months	cre+/+	F	24.7		86	6 months	cre+/+	M	28.1
445	6 months	cre+/+	F	27.2		856	6 months	cre+/+	M	29.2
446	6 months	cre+/+	F	26.4		857	6 months	cre+/+	M	33.3
638	6 months	cre+/+	F	21.7		974	6 months	cre+/+	M	38.2
639	6 months	cre+/+	F	19.8		975	6 months	cre+/+	M	38.4
690	6 months	cre+/+	F	21.6		976	6 months	cre+/+	M	36.7
691	6 months	cre+/+	F	26		1075	6 months	cre+/+	M	33.7
962	6 months	cre+/+	F	28.1		1146	6 months	cre+/+	M	39.3
9544x	6 months	WT	F	24.5		9256x	6 months	WT	M	34.1
9545x	6 months	WT	F	21		9257x	6 months	WT	M	35.5
9546x	6 months	WT	F	24.9		9229x	6 months	WT	M	34.8
9785x	6 months	WT	F	26		9439x	6 months	WT	M	36.7
9805x	6 months	WT	F	22.9		9541x	6 months	WT	M	34.3
9958x	6 months	WT	F	28.5		9542x	6 months	WT	M	37
701x	6 months	WT	F	25		9543x	6 months	WT	M	33.5
705m	6 months	WT	F	23		9783x	6 months	WT	M	38.5
706m	6 months	WT	F	23		9784x	6 months	WT	M	37.8
954x	6 months	WT	F	26.3		872m	6 months	WT	M	31.8
960m	6 months	WT	F	24		1022m	6 months	WT	M	34.4
1090x	6 months	WT	F	24.9		1551m	6 months	WT	M	37.1
1358x	6 months	WT	F	27.7		1914m	6 months	WT	M	21.2
1359x	6 months	WT	F	25.5		1915m	6 months	WT	M	32
1917m	6 months	WT	F	25.5		1916m	6 months	WT	M	28
1918m	6 months	WT	F	22.6		7790	6 months	f/+/cre+/+	M	33.7
9383	6 months	f/+/cre+/+	F	24.6		8848	6 months	f/+/cre+/+	M	27.8
9384	6 months	f/+/cre+/+	F	22		9253	6 months	f/+/cre+/+	M	31.4
9468	6 months	f/+/cre+/+	F	21.7		9298	6 months	f/+/cre+/+	M	31.3
9471	6 months	f/+/cre+/+	F	29.6		9559	6 months	f/+/cre+/+	M	29.4
9472	6 months	f/+/cre+/+	F	25.4		9376	6 months	f/+/cre+/+	M	27.4
9560	6 months	f/+/cre+/+	F	25.2		9377	6 months	f/+/cre+/+	M	29.9
9706	6 months	f/+/cre+/+	F	22.7		9378	6 months	f/+/cre+/+	M	28.9
9707	6 months	f/+/cre+/+	F	23.2		9379	6 months	f/+/cre+/+	M	29.3
9708	6 months	f/+/cre+/+	F	21.1		9380	6 months	f/+/cre+/+	M	30.6
9709	6 months	f/+/cre+/+	F	22.7		9983m	6 months	f/+	M	31.1
9986m	6 months	f/+	F	22.4		899m	6 months	f/+	M	31.4
9989m	6 months	f/+	F	24		900m	6 months	f/+	M	31.8
700x	6 months	f/+	F	22.2		993m	6 months	f/+	M	32.6
989m	6 months	f/+	F	22.8		994m	6 months	f/+	M	35.8
1091x	6 months	f/+	F	26.5		1405m	6 months	f/+	M	36.6
1106x	6 months	f/+	F	22.4		1406m	6 months	f/+	M	37.8
1107x	6 months	f/+	F	23.2		1644m	6 months	f/+	M	33.8
1360x	6 months	f/+	F	25.5		1645m	6 months	f/+	M	31.1
1379m	6 months	f/+	F	23.1
1410m	6 months	f/+	F	21.8

## Sheet: 12 months
Animal	Age	GT	Sex	Wt (g)			Animal	Age	GT	Sex	Wt (g)
7718h	12 months	f/f	F	32.1			9774h	12 months	f/f	M	40.5
7862x	12 months	f/f	F	25.2			9775h	12 months	f/f	M	43.9
8115x	12 months	f/f	F	24.9			9776h	12 months	f/f	M	45.1
8621m	12 months	f/f	F	30.9			9779h	12 months	f/f	M	41.1
8670x	12 months	f/f	F	27			9997h	12 months	f/f	M	31.2
8729x	12 months	f/f	F	29.3			9999h	12 months	f/f	M	34.4
9733m	12 months	f/f	F	29.3			409m	12 months	f/f	M	30.8
9734m	12 months	f/f	F	31.3			553m	12 months	f/f	M	37.1
9736m	12 months	f/f	F	33.2			734m	12 months	f/f	M	35.5
9739m	12 months	f/f	F	35			735m	12 months	f/f	M	34.4
8999	12 months	f/f/cre+/+	F	23.1			826m	12 months	f/f	M	30.8
9166	12 months	f/f/cre+/+	F	25.4			9302	12 months	f/f/cre+/+	M	29.8
9558	12 months	f/f/cre+/+	F	29.2			420	12 months	f/f/cre+/+	M	28.9
424	12 months	f/f/cre+/+	F	24.2			421	12 months	f/f/cre+/+	M	29.1
625	12 months	f/f/cre+/+	F	33.3			422	12 months	f/f/cre+/+	M	29
730	12 months	f/f/cre+/+	F	25.5			423	12 months	f/f/cre+/+	M	30.7
731	12 months	f/f/cre+/+	F	25.3			728	12 months	f/f/cre+/+	M	31.7
732	12 months	f/f/cre+/+	F	24.8			729	12 months	f/f/cre+/+	M	31.1
733	12 months	f/f/cre+/+	F	23.1			825	12 months	f/f/cre+/+	M	33.6
874	12 months	f/f/cre+/+	F	29.2			361	12 months	cre+/+	M	44
624	12 months	cre+/+	F	25.7			362	12 months	cre+/+	M	37.8
714	12 months	cre+/+	F	22.7			363	12 months	cre+/+	M	31.5
715	12 months	cre+/+	F	28.3			370	12 months	cre+/+	M	35.6
725	12 months	cre+/+	F	29.3			415	12 months	cre+/+	M	37.5
776	12 months	cre+/+	F	30.8			416	12 months	cre+/+	M	32.9
777	12 months	cre+/+	F	35.8			417	12 months	cre+/+	M	33.4
818	12 months	cre+/+	F				816	12 months	cre+/+	M	37.2
884m	12 months	WT	F	27.6			959	12 months	cre+/+	M	36.7
885m	12 months	WT	F	26.7			9600x	12 months	WT	M	42.3
1552m	12 months	WT	F	44.7			9601x	12 months	WT	M	35.8
1553m	12 months	WT	F	36.8			9602x	12 months	WT	M	40
1554m	12 months	WT	F	34.4			9603x	12 months	WT	M	40.5
1555m	12 months	WT	F	34.4			369m	12 months	WT	M	35
9724	12 months	f/+/cre+/+	F	19.9			957m	12 months	WT	M	39.5
9726	12 months	f/+/cre+/+	F	26			963m	12 months	WT	M	42.3
9727	12 months	f/+/cre+/+	F	24.8			964m	12 months	WT	M	46.8
9920	12 months	f/+/cre+/+	F	30.1			9303	12 months	f/+/cre+/+	M	30.5
9921	12 months	f/+/cre+/+	F	25.6			9719	12 months	f/+/cre+/+	M	30.9
9922	12 months	f/+/cre+/+	F	28.9			9720	12 months	f/+/cre+/+	M	31.2
9923	12 months	f/+/cre+/+	F	31.3			9721	12 months	f/+/cre+/+	M	36.8
9924	12 months	f/+/cre+/+	F	41.9			9722	12 months	f/+/cre+/+	M	34
45	12 months	f/+/cre+/+	F	29.4			9723	12 months	f/+/cre+/+	M	31.6
							9750	12 months	f/+/cre+/+	M	31.7
							9751	12 months	f/+/cre+/+	M	33
							9752	12 months	f/+/cre+/+	M	31
							9753	12 months	f/+/cre+/+	M	29.7
							9755	12 months	f/+/cre+/+	M	35
